# Kiawah and Seabrook islands are a critical site for the *rufa* Red Knot (*Calidris canutus rufa*)

Mary Margaret Pelton<sup>1\*</sup>, Sara R. Padula<sup>1\*</sup>, Julian Garcia-Walther<sup>1,7</sup>, Mark Andrews<sup>2</sup>, Robert Mercer<sup>3</sup>, Ron Porter<sup>4</sup>, Felicia Sanders<sup>5</sup>, Janet Thibault<sup>6</sup>, Nathan R. Senner<sup>1</sup>, and Jennifer A. Linscott<sup>1,7</sup>

<sup>1</sup>Department of Biological Sciences, University of South Carolina, 715 Sumter Street, Columbia, SC 29208, USA

<sup>2</sup>2929 Baywood Drive, Seabrook Island, SC 29455, USA

<sup>3</sup>1244 Creek Watch Trace, Seabrook Island, SC 29455, USA

<sup>4</sup>1800 Quinard Court, Ambler, PA, 19002, USA

<sup>5</sup>South Carolina Department of Natural Resources, 220 Santee Gun Club Road, McClellanville, SC 29458, USA

<sup>6</sup>South Carolina Department of Natural Resources, 216 Fort Johnson Road, Charleston, SC 29422, USA

<sup>7</sup>Corresponding authors: [linscotj@email.sc.edu](mailto:linscotj@email.sc.edu) & [garciawj@email.sc.edu](mailto:garciawj@email.sc.edu)

\*These authors contributed equally.

## ABSTRACT

The *rufa* Red Knot (*Calidris canutus rufa*) is a migratory shorebird that performs one of the longest known migrations of any bird species — from their breeding grounds in the Canadian Arctic to their nonbreeding grounds as far south as Tierra del Fuego — and has experienced a population decline of over 85% in recent decades. During migration, knots rest and refuel at stopover sites along the Atlantic Coast, including Kiawah and Seabrook islands in South Carolina. Here, we document the importance of Kiawah and Seabrook islands for knots by providing population and stopover estimates during their spring migration. We conducted on-the-ground surveys between 19 February - 20 May 2021 to record the occurrence of individually marked knots. In addition, we quantified the ratio of marked to unmarked knots and deployed geolocators on knots captured in the area. Using a superpopulation model, we estimated a minimum passage population of 17,247 knots (~41% of the total *rufa* knot population) and an average stopover duration of 47 days. Our geocator results also showed that knots using Kiawah and Seabrook islands can bypass Delaware Bay and fly directly to the Canadian Arctic. Finally, our geolocators, combined with resighting data from across the Atlantic Flyway, indicate that a large network of more than 70 coastal sites mostly concentrated along the coasts of Florida, Georgia, South Carolina, and North Carolina provide stopover and overwintering habitat for the knots we observed on Kiawah and Seabrook islands. These findings corroborate that Kiawah and Seabrook islands should be recognized as critical sites in the knot network and, therefore, a conservation priority. As a result, the threats facing the sites — such as prey management issues, anthropogenic disturbance, and sea level rise — require immediate attention.

## INTRODUCTION

Migration is the process whereby individuals move from one area to another to exploit alternative resources or environments that fluctuate in suitability (Winger *et al.* 2019). Migration can range from short-distance movements to those that cover tens of thousands of kilometers

46 (Alerstam *et al.* 2003). The *rufa* Red Knot (*Calidris canutus rufa*, hereafter, ‘knot’) is a long-  
47 distance migratory shorebird that performs one of the longest migrations of any bird species  
48 (Piersma *et al.* 2005, Conklin *et al.* 2017), with some individuals traveling ~30,000 km from  
49 their breeding grounds in the Canadian Arctic (70°N) to nonbreeding grounds in the southeastern  
50 U.S. (Niles *et al.* 2012) and as far south as Tierra del Fuego at the southern tip of South America  
51 (53 – 54°S; Niles *et al.* 2008, Burger *et al.* 2012). Knots face numerous threats along their  
52 migratory route and, in 2015, were listed as a threatened species in both Canada and the United  
53 States due to a steep population decline of 85% over the past few decades (USFWS 2014).

54  
55 Knots migrate between their breeding and nonbreeding grounds along the Atlantic Flyway and  
56 undertake several nonstop flights of thousands of kilometers without feeding or resting (Niles *et*  
57 *al.* 2008). To endure the energetic demands of such long flights, knots rely on stopover sites  
58 where they can rest and refuel (Baker *et al.* 2004, Atkinson *et al.* 2007). The annual cycles and  
59 migratory strategies of knots, in turn, require that knots time their migrations to coincide with the  
60 occurrence of superabundant but ephemeral resources at their stopovers (Piersma & Baker 2000).  
61 Delaware Bay — one of the best studied stopover sites for knots — exemplifies this dependency.  
62 Knot arrival at Delaware Bay coincides with the spawning of the horseshoe crabs (*Limulus*  
63 *polyphemus*) on which they feed in order to refuel and continue their migrations to the Arctic  
64 (Niles *et al.* 2008, McGowan *et al.* 2011, Tucker *et al.* 2021). Delaware Bay, however,  
65 represents only one site within a larger network of beaches, estuaries, and barrier islands (Cohen  
66 *et al.* 2009, 2010a,b, Tuma & Powell 2021) that share a suite of pressures including  
67 anthropogenic disturbance (Burger *et al.* 2007), coastal development (Buler & Moore, 2011), and  
68 unsustainable prey harvest practices (Niles *et al.* 2009). As a result, knots’ foraging efficiency  
69 has decreased at some sites, and they have failed to reach the minimum threshold of mass gain to  
70 complete their migrations in some years (Baker *et al.* 2004). Given that climate change and sea  
71 level rise will continue to exacerbate the pressures on stopover sites that support knots and other  
72 shorebirds (Iwamura *et al.* 2013, Rakhimberdiev *et al.* 2018), there is an urgent need to identify  
73 all critical stopover sites for these at-risk species.

74  
75 Within North America, the network of sites used by knots spans much of the Atlantic Coast. In  
76 addition to Delaware Bay, the Eastern Shore of Virginia is known to support upwards of 5,000  
77 knots during spring migration (Cohen *et al.* 2010a). Recent evidence suggests that more than two  
78 dozen coastal sites in the southeastern U.S. (i.e., from Texas to South Carolina) also support  
79 knots during migration and the nonbreeding season (Tuma & Powell 2021). In Georgia, for  
80 instance, estimates indicate that between 8,000-24,000 knots stop during fall migration (Lyons *et*  
81 *al.* 2018). Intriguingly, flocks of up to 8,000 knots have been recorded in spring as well on the  
82 Kiawah-Seabrook Island complex in South Carolina (Thibault 2013) — a relatively small site in  
83 comparison to most others in the network. Kiawah and Seabrook islands, however, have received  
84 relatively little attention and much remains to be learned about how (and how many) knots use  
85 them over the course of the year (Smith *et al.* 2019).

86  
87 Population estimates of overwintering and migrating shorebirds are traditionally difficult to  
88 quantify because of fluctuating numbers of birds as they enter and exit a site during the season  
89 (Lyons *et al.* 2016, Lok *et al.* 2019). We aim to build on the count data collected on Kiawah and  
90 Seabrook islands in previous studies to assess its importance to knots by accounting for the flow-  
91 through nature of stopover sites. To do this, we used a mark-resighting approach following

92 Lyons *et al.* (2016) to estimate the: (1) population size, (2) stopover duration, (3) connectivity,  
93 and (4) overwintering status of knots using the Kiawah-Seabrook Island complex. We  
94 complemented these analyses by assessing stopover site usage along the Atlantic Flyway by  
95 knots carrying light-level geolocators and using the online [www.bandedbirds.org](http://www.bandedbirds.org) database to link  
96 the knots we resighted in South Carolina with resightings from other sites across the flyway.  
97 Ultimately, we believe that our study can contribute to a broader understanding of the knot  
98 annual cycle and efforts to conserve knots wherever they occur throughout the year.

99

## 100 **METHODS**

### 101 ***Study area***

102 Our study area comprised 24 kilometers of sandy beach in the Kiawah-Seabrook Island complex  
103 (hereafter, KSI) on the coast of South Carolina (32°35'10.6"N, 80°07'47.6"W; Fig. 1). Seabrook  
104 and Kiawah islands are bordered by the North Edisto and Stono rivers, respectively. The islands  
105 are divided by Captain Sam's Inlet, which is critical to local fauna, including strand feeding  
106 common bottlenose dolphins (*Tursiops truncatus*; Dybas 2021), foraging seabirds, and a variety  
107 of roosting shorebirds, including knots. This area also provides critical overwintering habitat for  
108 Piping Plovers (*Charadrius melodus*) and nesting habitat for Wilson's Plovers (*C. wilsonia*),  
109 American Oystercatchers (*Haematopus palliatus*), and Least Terns (*Sternula antillarum*), all of  
110 which are species of conservation concern in South Carolina (USFWS 2001, SCDNR 2015). Due  
111 to its unusual hydrodynamic regime, the inlet experiences frequent shifts and geomorphological  
112 changes. It has also been intentionally relocated several times, most recently in 2015 (Doyle &  
113 Adams 2015). A semi-diurnal tide results in shorebirds using the inlet twice each day to roost  
114 during high tide.

115

116 At low tides, shorebirds occupy the complex's sandy beaches where they feed primarily on  
117 invertebrate prey. Benthic core and knot fecal samples suggest the knots diet on KSI consists  
118 primarily of coquina clams (*Donax variabilis*; Thibault & Levisen 2013). Both islands are  
119 popular tourist destinations with fully developed coastlines containing golf courses, several  
120 resorts, and popular public beach access points with high levels of human and dog disturbance.  
121 At the south end of the study area, South Carolina Department of Natural Resources owned  
122 Deveaux Bank — an ephemeral offshore sand bank — provides additional undeveloped habitat  
123 for shorebirds and marine birds. Knots move back and forth between KSI and Deveaux Bank,  
124 especially during spring horseshoe crab spawning events, with horseshoe crab eggs comprising  
125 an additional important component of their diet (Thibault & Levisen 2013, SCDNR 2018). As  
126 Deveaux Bank requires boat access, it was not surveyed during our study.

127

### 128 ***Banding***

129 Standardized shorebird banding was implemented in the Western Hemisphere beginning in the  
130 mid-1980s (PASG 2016). Across the Atlantic Flyway, ~8% (Lyons 2021) of the knot population  
131 is marked with flags consisting of a unique alphanumeric code that allows for the identification  
132 of each marked bird (Clark *et al.* 2005). Flags are colored according to the Pan American  
133 Shorebird Group protocol, with colors corresponding to the area in which the bird was marked  
134 (PASG 2016). These possible areas are: Canada, the United States, Mexico, Central America, the  
135 Caribbean, northern South America, Argentina, and Chile. By resighting knots that have been  
136 previously marked by other researchers, we estimated their passage population and stopover  
137 duration. Compiling resighting data from other sites in North America also allowed us to identify

138 connections between South Carolina and stopover sites throughout the knot migratory network.  
139

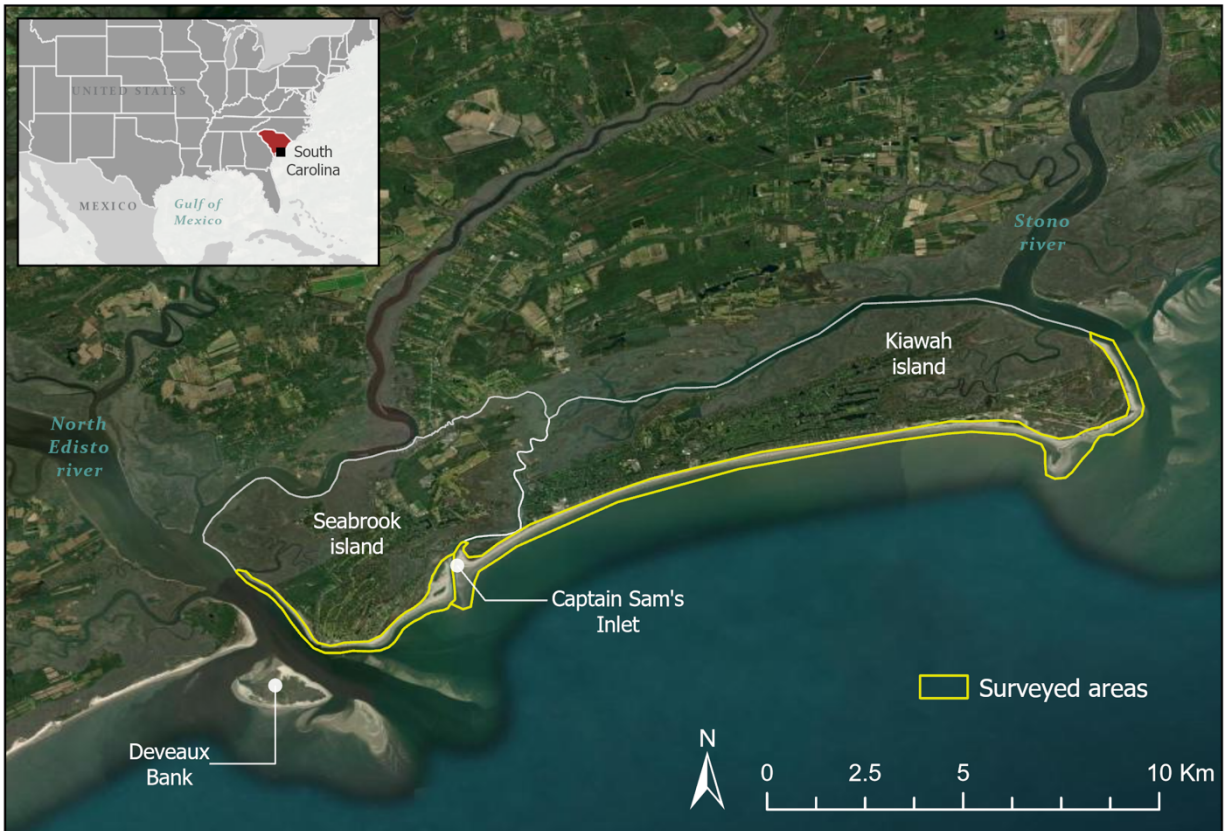

140  
141 *Figure 1. The Kiawah-Seabrook Island Complex, South Carolina consists of 24 kilometers of sandy*  
142 *beaches and an estuarine inlet.*  
143

#### 144 **Data collection**

145 We collected data from 19 February - 20 May 2021 — a period during which migrating knots  
146 were likely to be present in KSI. After a two-week period of observer training, KSI was surveyed  
147 2-4 times a week by two separate observers between February-March. In April and May — the  
148 period of expected peak knot presence — we increased our sampling effort to 4-6 times a week.  
149 These observations resulted in 13 weeks of total effort. Due to restricted access, flag readings  
150 and scan samples were collected from Seabrook, but not Kiawah, from 14-20 May.

151 The 24 km of KSI beaches were surveyed by randomly selecting beach-walking access points,  
152 which served as the survey starting point for a given island. We performed surveys within ~2.5  
153 hours of high tide when knots were likely to be relatively stationary. When a flock was found,  
154 we performed a series of flag ratio scans using spotting scopes by recording the number of  
155 individuals with and without leg flags. We sampled without replacement as much as possible by  
156 scanning from one end of the flock to the other. Efforts were also made to avoid recounting  
157 flocks in the same day by not taking samples from flocks that we had already encountered and  
158 from which we therefore recognized flag combinations. Additionally, we ensured that we had  
159 adequate coverage of birds on KSI to the best of our ability by randomly selecting sites to survey  
160 and having two observers working separately during the week. If birds in a scan had flags, we



161 recorded the flag color, alphanumeric code, and presence of any other device that it might carry.  
162 We also recorded the specific location, time, wind, and tide of each sighting.

### 163 ***Flag and geolocator deployment***

164 Between April 2015 and May 2016, we deployed geolocators on knots captured in South  
165 Carolina. Knots were captured using cannon nets on Bird Key Stono Seabird Sanctuary on 21  
166 April 2015; in Cape Romain National Wildlife Refuge at Marsh Island on 16 October 2015; and  
167 on Deveaux Bank Seabird Sanctuary on 10 May 2016. Captures were made at high tide roosts at  
168 Bird Key and Marsh Island, and while feeding on horseshoe crab eggs as the tide fell on  
169 Deveaux Bank. Upon capture, birds were immediately removed from the net and placed in  
170 keeping cages for processing. All birds were measured and fitted with a uniquely inscribed 3-  
171 character leg flag and U.S. Geological Survey metal band. Migrate Technology Ltd. geolocators  
172 weighing 1.1 g were attached to leg bands as described in Niles *et al.* (2010). The units record  
173 the maximum light level every minute and conductivity (i.e., contact with alkaline water) every 3  
174 seconds. A total of 33 geolocators were deployed, but only three were retrieved. One knot  
175 captured at Deveaux Bank was recaptured on Tierra del Fuego on 13 January 2018. A geolocator  
176 deployed at Bird Key was retrieved from a dead knot (presumably from red tide, a harmful algal  
177 bloom) found in the Tampa Bay, Florida region. And, finally, a geolocator from Marsh Island  
178 was retrieved from a knot recaptured at Seabrook Island on 29 April 2017.

179

### 180 ***Mark-resighting analysis***

181 We reconstructed mark-resighting data for each marked knot on a weekly basis by combining all  
182 observations within one week into a single observation, beginning 19 February. We used the  
183 [www.bandedbirds.org](http://www.bandedbirds.org) database to verify our resightings. For those marking schemes that had  
184 been input into the database (e.g., from the United States and Canada), we removed observations  
185 of flag codes that had no corresponding capture history. Some marking schemes did not appear  
186 in the database, however; in these cases, we retained all observations with a high degree of  
187 observer certainty. We then used an open population Jolly-Seber (JS) modeling framework to  
188 explore the flow of arriving, stopped over, and departing knots during the spring migratory  
189 period. Specifically, we used the superpopulation parameterization of the JS model — a  
190 hierarchical, state-space parameterization that incorporates data augmentation (Crosbie & Manly  
191 1985, Royle & Dorazio 2008, Kéry & Schaub 2012) — to estimate the probabilities of entering  
192 ( $\beta$ ) the study site, staying ( $\phi$ ) to the next week, and resighting ( $\rho$ ). These parameters are  
193 analogous to the demographic parameters of recruitment, survival, and recapture in conventional  
194 mark-recapture JS models, respectively. We implemented methods from Lyons *et al.* (2016) to  
195 add a binomial model for flag ratio scan samples, which also enabled us to estimate total passage  
196 population, or the number of knots estimated to use KSI during the spring migratory period.  
197 More recently developed models additionally allow for the statistical identification of groups that  
198 might pass through a site separately (e.g., Lok *et al.* 2019). However, knot local- and regional-  
199 scale movements, and the resulting resighting heterogeneity early during our study period (see  
200 below), precluded us from employing these models, meaning that we could only estimate a  
201 single, average stopover duration for all knots using KSI.

202

203 We verified that the JS model fit our data using goodness-of-fit tests developed for capture-  
204 recapture models in the R Programming Environment (version 4.1.1; R Core Development Team  
205 2016) and package ‘R2ucare’ (Gimenez *et al.* 2018). Omnibus testing of the null hypothesis that  
206 the model was an adequate fit for the data was non-significant ( $p = 0.11$ ,  $\chi^2 = 43.34$ ,  $df = 33$ ),

207 indicating that we did not need to adjust the model for transience or trap-dependence. We also  
 208 explored support for time-varying versus constant parameters. In a stopover context, entry  
 209 probabilities ( $\beta$ ) are commonly allowed to vary over time, since individuals may be less likely to  
 210 arrive at a stopover site during some weeks (e.g., the last week) than others. We compared  
 211 various models that constrained the probabilities of staying ( $\phi$ ) and resighting ( $\rho$ ) to be constant  
 212 and/or allowed them to vary with sampling occasion (week). Models were fit using encounter  
 213 histories and the POPAN model in program MARK (White and Burnham 1999) *via* the R  
 214 package ‘RMark’ and compared using Akaike’s Information Criterion adjusted for small sample  
 215 sizes (AIC<sub>c</sub>; Burnham & Anderson 2002). The most parsimonious model (AIC<sub>c</sub> < 2 and with the  
 216 fewest parameters) consisted of a constant staying probability and weekly variation in resighting  
 217 probability (Table 1).

218  
 219  
 220  
 221

**Table 1** Model comparison for time-varying versus constant  $\phi$  and  $\rho$  parameters. K = number of parameters; Weight = Akaike weight.

| Model                   | K  | AIC <sub>c</sub> | $\Delta$ AIC <sub>c</sub> | Weight | Deviance |
|-------------------------|----|------------------|---------------------------|--------|----------|
| $\beta_t \phi_c \rho_t$ | 27 | 856.594          | 0.000                     | 0.999  | -711.943 |
| $\beta_t \phi_t \rho_t$ | 38 | 879.294          | 22.700                    | <0.001 | -716.126 |
| $\beta_t \phi_c \rho_c$ | 15 | 897.980          | 46.385                    | <0.001 | -643.268 |
| $\beta_t \phi_t \rho_c$ | 26 | 905.934          | 49.339                    | <0.001 | -660.251 |

222 We performed a Bayesian analysis integrating the superpopulation JS model with the binomial  
 223 scan sample model, using the approach outlined in Lyons *et al.* (2018). The JS model estimates  
 224 stopover duration using encounter histories and a latent state variable that reflects arrival in and  
 225 departure from the study site (Lyons *et al.* 2016). The latent state variable ( $z_{i,t}$ ) is a time-specific  
 226 Bernoulli random variable for each individual  $i$  in the population (i.e., flagged and unflagged) at  
 227 time  $t$ , where  $z_{i,t} = 1$  while using the stopover site and  $z_{i,t} = 0$  before arrival and after departure.  
 228 The posterior latent states are then summed across individuals to estimate the stopover duration  
 229 (Lyons *et al.* 2018). In this way, the calculation of mean stopover duration is robust to variations  
 230 in resighting probability, which were pronounced during weeks when knots roosted and foraged  
 231 on Deveaux Bank or moved among sites in the southeastern U.S.

232 Using flag scan samples, we modeled the number of flagged individuals in a scan sample  
 233 as a binomial random variable

234 
$$m_s \sim \text{Binomial}(C_s, \pi_t)$$

235 where  $m_s$  is the number of flagged individuals in the scan sample  $s$ ,  $C_s$  is the number of  
 236 individuals checked for flags, and  $\pi_t$  is the proportion of flagged individuals in the population  
 237 during the corresponding week. This modification for weekly variation in the proportion of the  
 238 population that is flagged ( $\pi_t$ ) suits the pulsed arrivals of two or more migratory groups that may  
 239 differ in the proportion flagged, which we expected to find at our study site. The total passage

240 population was then calculated as the sum of the arrivals at each sampling occasion, adjusted for  
241 the flagged proportion at the corresponding occasion

$$242 \quad \hat{N} = \sum B_t / \pi_t$$

243 where  $\hat{N}$  is the total passage population,  $B_t$  is the number of entries/arrivals at a sampling  
244 occasion  $t$ , and  $\pi_t$  is the proportion of the population carrying alphanumeric flags at occasion  $t$ . In  
245 this way, the integrated model thus estimated both stopover dynamics (e.g., stopover duration,  
246 mean staying probability, weekly resighting probability) and the derived weekly and total  
247 passage population.

248 The full model incorporating the JS model and flag scan sample ratios was implemented in R  
249 using the package ‘jagsUI’ (Kellner 2016) as an interface with JAGS software (Plummer 2003).  
250 We followed guidance from Kéry & Schaub (2012) for parameter-expanded data augmentation  
251 (PX-DA; Royle & Dorazio 2012) in order to fix the parameter space for analysis, adding  
252 potential unobserved individuals as all-zero encounter histories ( $n = 600$ ) to our dataset. We  
253 checked that this value was sufficiently large by visually inspecting the posterior distribution of  
254 the estimated number of total marked individuals ( $\hat{M}$ ) to verify that it was not truncated.  
255 Following Lyons *et al.* (2018), we used uniform priors (0,1) for the staying and resighting  
256 probabilities and uninformative priors for arrival probability. We simulated three MCMC chains  
257 of 90,000 iterations each, with burn-in periods of 30,000 iterations and a thinning rate of 3. We  
258 assessed convergence of the chains visually and *via* the Brooks-Gelman-Rubin statistic ( $\hat{R}$ ;  
259 Brooks & Gelman 1998), where models with parameter values  $< 1.1$  were considered to have  
260 converged. All values are presented as means and 95% credible intervals unless otherwise noted.

### 261 ***Geolocator and connectivity analysis***

262 To corroborate our mark-resighting results, we used our geolocation data to answer three  
263 questions: (1) How long did knots stopover in South Carolina during their northward migration?  
264 (2) How many stops did knots make after departing from South Carolina for the breeding  
265 grounds? and, (3) Where were those stops? Geolocators were analyzed using the R package  
266 *FLightR* (Rakhimberdiev *et al.* 2017) — which has been shown to successfully delineate the  
267 movements of migratory shorebirds (Rakhimberdiev *et al.* 2016) — and followed the workflow  
268 outlined in Lisovski *et al.* (2019). Briefly, before deploying our geolocators, we placed them  
269 outside for a ~7-day long period that we then used within *FLightR* to calibrate the data from each  
270 geolocator. We otherwise used the default package settings, but constrained the locations  
271 identified as stopover sites to coastal areas. We included all sites at which an individual was  
272 estimated to stop for at least 2 days with a (movement) probability of 0.8 and considered an  
273 individual to have stopped in South Carolina if a stopover was recorded between 30-33°N. Using  
274 this approach, we estimated the mean ( $\pm 1$  SD) of the dates of arrival and departure from South  
275 Carolina, the number of stops an individual made after departing South Carolina on its way  
276 northward, and the location of those stops.

277 To further assess migratory connectivity, we searched the online database [www.bandedbirds.org](http://www.bandedbirds.org)  
278 and retrieved the capture and resighting history for every knot that we resighted during our study.  
279 With this information, we mapped the network of sites used by knots during their passage  
280 through the U.S. and Canada. We eliminated sites that were less than 10 km from each other  
281 using a rarifying filter in R (Brown *et al.* 2014).

282

## 283 RESULTS

### 284 *Resighting results*

285 We recorded 217 uniquely flagged knots during our 13-week study period. Resightings occurred  
286 in all weeks except for the week beginning 26 March, when knots in the KSI area were observed  
287 only on nearby Deveaux Bank (N.R. Senner pers. obs.). We recorded flag scan samples in all  
288 weeks except for the two-week period beginning 19 March, also due to temporary knot roosting  
289 and foraging on Deveaux Bank. Resightings and scan samples occurred throughout KSI but were  
290 most common near Captain Sam's Inlet, shortly before or after high tide. Most resighted  
291 individuals carried dark green or lime green flags indicative of having been flagged in the U.S.  
292 Other individuals flagged in South America appeared later in the season (Fig. 2) and during this  
293 period we observed flocks of at least 4,000 individuals on multiple occasions. While new  
294 resightings occurred up until the final week, nearly all knots had departed by 21-27 May (M.  
295 Andrews & R. Mercer, pers. obs.).

296 Our model estimated a minimum total passage population of 17,247 knots (95% CI: 13,548,  
297 22,099) during our study period. Of this passage population, 2.4% (95% CI: 1.9, 2.9) on average  
298 were estimated to be flagged. This estimate is approximately 41% of the total global population  
299 of 42,000 *rufa* knots (Andres *et al.* 2012). On average, individuals spent 47 days (95% CI: 40.1,  
300 54.8) at the study site.

301 *Figure 2: Number of uniquely flagged Red Knots and the corresponding flag colors encountered*  
302 *each week from February-May 2021 on Kiawah and Seabrook islands, South Carolina. Dates*  
303 *shown represent the start of each week.*

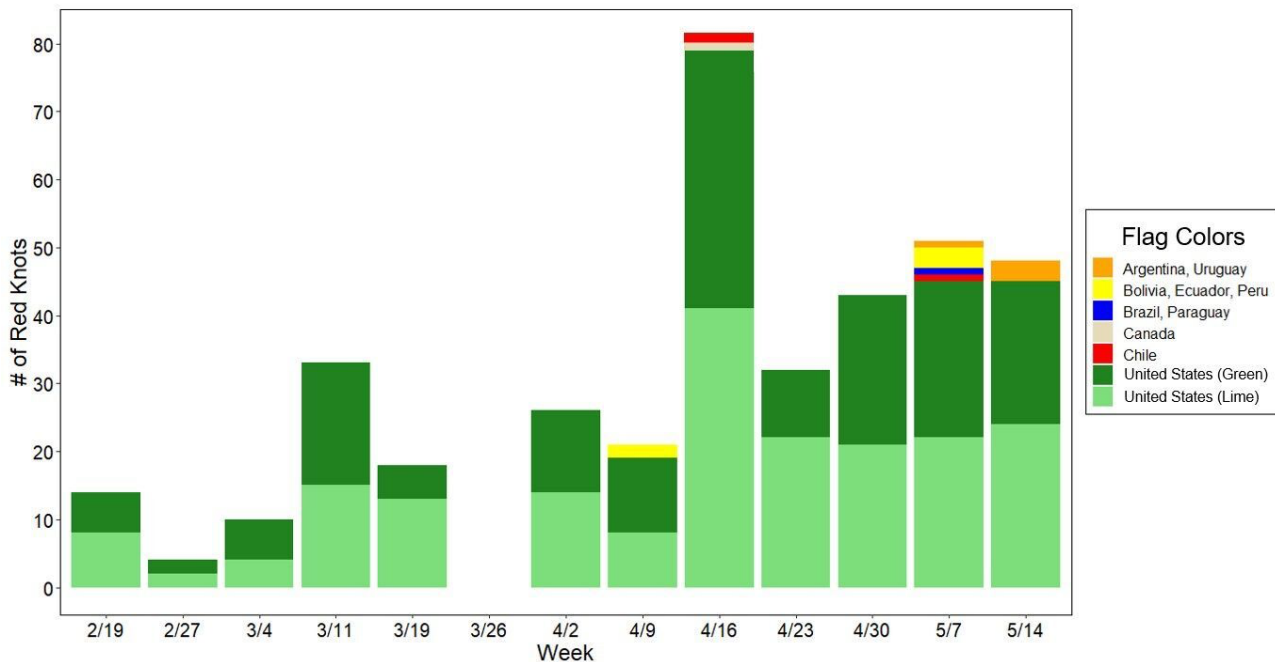



304 The model estimated one constant parameter — staying probability (0.91, 95% CI: 0.86, 0.95) —  
305 and three parameters that were allowed to vary on a weekly basis — entry probability, resighting  
306 probability, and population size. Entry probability was highest in the first week and remained  
307 relatively consistent thereafter (Fig. 3A). Resighting probability increased in the fourth week,  
308 was lower during the weeks that knots spent most of their time on Deveaux Bank, and increased  
309 again later in the season (Fig. 3B). The estimated weekly population size increased throughout  
310 the season, starting at 2,411 (95% CI: 858, 5,050) in the first week and ending at 13,852 (95%  
311 CI: 9,764, 19,254) the week of 14 May (Fig. 3C).

312

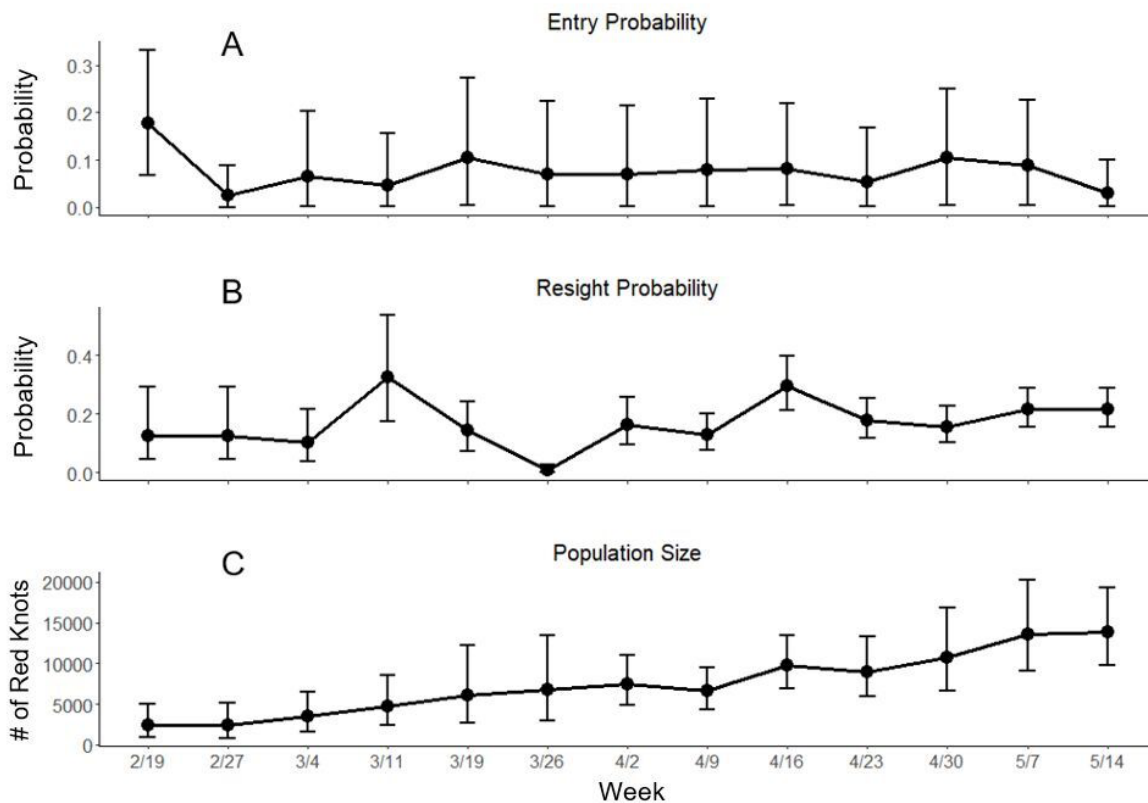

313 *Figure 3. Model-derived estimates of the weekly entry probability (A), resighting probability (B),*  
314 *and population size (C) for Red Knots on Kiawah and Seabrook islands, South Carolina. Bars*  
315 *around estimates represent model generated 95% credible intervals.*

316

### 317 **Geolocator results**

318 Each of our three geolocator-carrying individuals spent the nonbreeding season in a different  
319 region: one on Tierra del Fuego (50.54°S; Fig. 4A, B); one along the Atlantic Coast, moving  
320 among sites from Georgia to North Carolina (30.3-35.1°N; Fig. 4C); and one on the Gulf Coast  
321 of Florida (27.2-29.2°N; Fig. 4D). Of the two individuals that did not spend the nonbreeding  
322 season in or close to South Carolina, both arrived in the region 2-5 May and departed  
323 approximately three weeks later ( $\mu = 20 \pm 1$  d), between 23 May-1 June ( $n = 3$  departures).  
324 Across all three individuals and all years during which they were tracked, northward departure  
325 from South Carolina averaged 24 May  $\pm$  5 d ( $n = 5$  departures). Once departing South Carolina,  
326 the three individuals stopped on average  $1.8 \pm 1$  times, with those stops occurring north of 49°N,

327 mostly along the western shore of either James or Hudson bays, Canada (49.3-55.4°N; Fig. 4A).  
328 Because of the nature of geolocation data and Arctic summers, we were unable to identify the  
329 breeding areas used by any of the individuals.

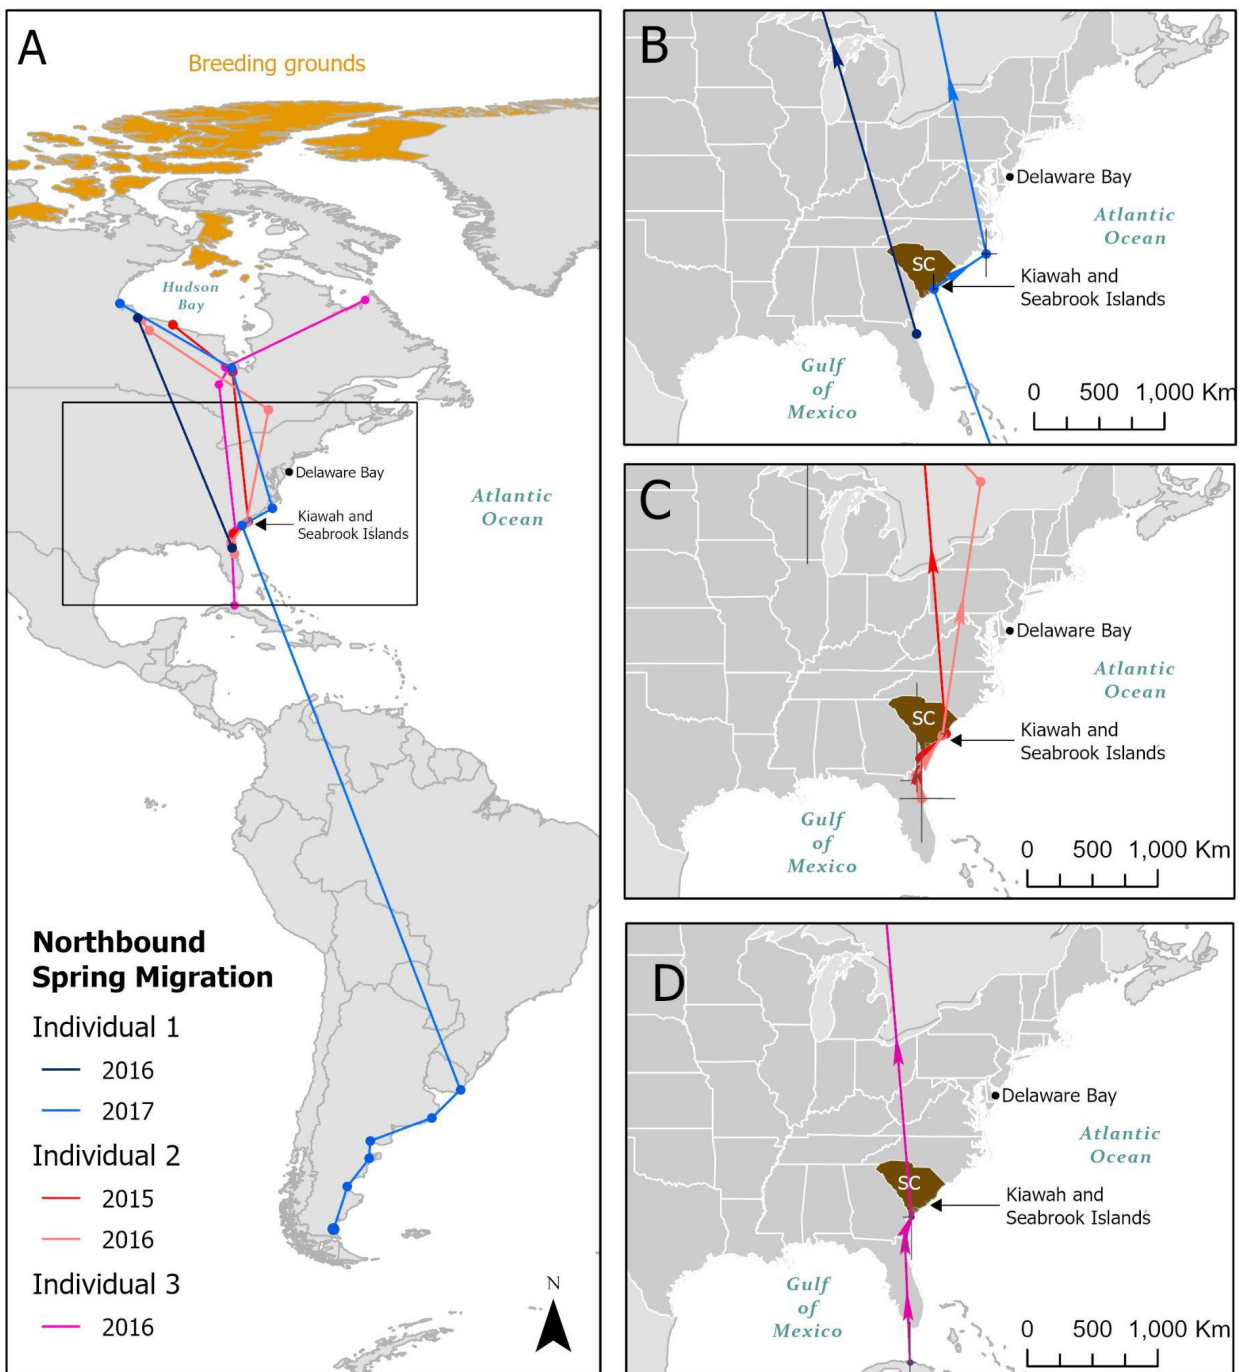

330  
331 *Figure 4: Northbound migratory tracks obtained using light-level geolocators attached to three*  
332 *Red Knots (blue, red, and purple lines, respectively) from 2015-2017 (map inset A). Map inset B,*  
333 *C, and D show northbound movements of individuals 1, 2, and 3 along the Atlantic Coast of the*

334 *United States, respectively. Vertices show latitudinal and longitudinal 95% confidence intervals*  
335 *(black lines). Kiawah and Seabrook islands are highlighted to show when birds stopped over at*  
336 *the site, while Delaware Bay is shown as a reference point for other studies of knot migration.*

337

### 338 ***Flyway-wide resighting results***

339 The capture history of the birds with dark or lime green flags that we resighted indicates that  
340 they were captured at 18 sites along the U.S. Atlantic Coast (1 in Texas, 4 in Florida, 4 in South  
341 Carolina, and 8 in Delaware Bay). Furthermore, based on their resighting history, the knots we  
342 resighted have used a network of at least 74 sites, including beaches, barrier islands, estuaries,  
343 inlets, and sandbars. These resightings came from Texas, Louisiana, Florida, Georgia, South  
344 Carolina, North Carolina, Virginia, Maryland, Delaware, New Jersey, Connecticut, and  
345 Massachusetts in the U.S., as well as Ontario (James Bay) and Quebec in Canada.

346

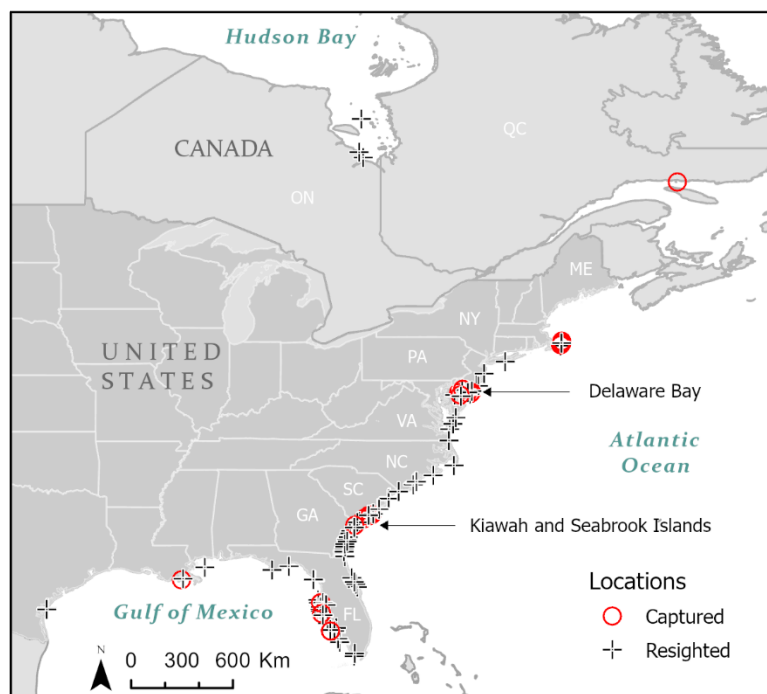

347

348 *Figure 5. Network of sites where the Red Knots resighted on Kiawah and Seabrook islands,*  
349 *South Carolina were initially flagged (red circles) and where they were subsequently resighted*  
350 *(black crosses) along the Atlantic Coast of Canada and the U.S.*

351

## 352 **DISCUSSION**

353 The Atlantic Coast of North America hosts a number of critical migratory stopover sites for *rufa*  
354 Red Knots, but the majority of scientific and conservation attention has focused on only a few of  
355 those sites, such as Delaware Bay (Baker *et al.* 2004, Atkinson *et al.* 2007, Niles *et al.* 2009) and  
356 coastal Virginia (Cohen *et al.* 2009, 2010a,b). Using a superpopulation model, we estimated that  
357 the 24-km stretch of sandy beaches on Kiawah and Seabrook islands in South Carolina hosted at  
358 least 17,247 (95% CI: 13,548, 22,099) knots from February-May 2021, representing ~41% of the  
359 estimated global *rufa* knot population of 42,000 individuals (Andres *et al.* 2012). While knot site  
360 fidelity to individual sites may exhibit large interannual variation (Piersma *et al.* 2021, Tucker  
361 *et al.* 2021) depending on the conditions and resource dynamics of the region (van Gils *et al.* 2005),

362 our study suggests that KSI is a critical site for knots along the Atlantic Coast and deserves  
363 increased recognition and conservation attention.

364

### 365 ***Population estimates***

366 Across the Atlantic Flyway, a combination of methods has been used to develop estimates of  
367 knot population sizes at stopover and nonbreeding sites. These have ranged from: (1) mark-  
368 recapture approaches, which led to an estimation of 18,000 knots using Delaware Bay during  
369 spring migration in 2004 (Gillings *et al.* 2010) and 23,400 knots using the Georgia coast in fall  
370 2011 (Lyons *et al.* 2018); (2) peak count approaches, which resulted in estimates of 5,939 knots  
371 using the Virginia coast from 2004-2007 (Cohen *et al.* 2010a); and, (3) hybrid approaches, which  
372 generated estimates of 8,750 knots using four sites along the South Carolina and Georgia coasts  
373 in the spring of 2019 (Smith *et al.* 2019). This variation in methodologies — as well as variation  
374 in their interpretation — has led to persistent uncertainty about the number of knots using  
375 specific sites, as well as about the total number occurring along the Atlantic Flyway. We  
376 hypothesize that our higher estimates of knots using KSI relative to previous estimates from the  
377 site and those from other sites along the Atlantic Coast may be a result of either interannual  
378 variation in site usage as suggested by Tucker *et al.* (2021) and our geolocator data (Fig. 4),  
379 improved resighting effort and statistical methodologies, an actual shift in site usage by knots, or  
380 a combination of the three. Our estimates should nonetheless be viewed as a minimum, as  
381 additional knots might have passed through KSI the week of 21-27 May after our regular  
382 resighting efforts ceased. Regardless, this variation corroborates the need for more  
383 comprehensive estimates to be generated from mark-recapture studies along the entire Atlantic  
384 Coast on a regular basis.

385

### 386 ***KSI likely supports both overwintering and migrant knots***

387 Our resighting (Fig. 1) and geolocator (Fig. 4) data indicate that there are likely two groups of  
388 knots using KSI: (1) overwintering knots that stayed on KSI and in surrounding areas or arrived  
389 early in the year, as exemplified by the abundance and substantial number of flags we detected at  
390 the beginning of our surveys, and (2) spring migrants, as exemplified by the increased population  
391 estimates and proportion of flagged individuals we observed as the season progressed. Knots are  
392 known to use the southeastern U.S. coast, including South Carolina, during the nonbreeding  
393 season (Burger *et al.* 2012, Niles *et al.* 2012, Tuma & Powell 2021), and Lyons *et al.* (2018)  
394 estimated that this region alone supports  $\geq 10,400$  knots during this period. Our results confirmed  
395 that one of our geolocator-carrying individuals moved among Georgia, South Carolina, and  
396 North Carolina during the nonbreeding season before ultimately migrating northward from South  
397 Carolina in late May. Likewise, during our surveys, we estimated that  $\sim 2,400$  knots were present  
398 at KSI as early as 19 February (Fig. 2). We then subsequently detected  $\sim 42\%$  of the marked  
399 knots we observed during the first two weeks of the study again in May. In contrast, we would  
400 expect that longer distance migrants would exhibit later arrivals and shorter stopover durations.  
401 Accordingly, our other two geolocator-carrying knots — which spent the nonbreeding season in  
402 Florida and southern South America, respectively (Fig. 4) — arrived in South Carolina in early  
403 May and departed  $\sim 3$  weeks later. This suggests that KSI may not only be an important stopover  
404 site for spring migrants but an important site for overwintering knots as well.

405

406 In this respect, our results mirror those of Lyons *et al.* (2018), who found that during fall  
407 migration knots spent an average of 38 days at the Altamaha River Delta, with a group of longer



408 distance migrants (Tierra del Fuego) that stopped over for ~21 days and a group of shorter  
409 distance migrants (Southeastern U.S., Caribbean islands, and Brazil) that stopped over for ~42  
410 days. Our model, however, was unable to differentiate between the two apparent groups in our  
411 study and we could not estimate the difference in the duration of their respective stays on KSI.  
412 This is because the methods from Lyons *et al.* (2016), on which our models were based, are  
413 unable to identify the presence of multiple groups and our resighting effort was not great enough  
414 to parameterize more complex models (e.g., Lok *et al.* 2019) that could capture the varying  
415 behaviors likely exhibited by the ‘overwintering’ and ‘migrant’ groups. A key focus of future  
416 research should therefore be to increase resighting efforts in the region, and specifically on KSI,  
417 throughout the nonbreeding season (early November – early June) to try to generate robust  
418 estimates of the sizes of these two apparent groups.

419

### 420 ***Importance of KSI in the knot migratory network***

421 Delaware Bay has historically been regarded as the last steppingstone at which knots can refuel  
422 before departing to their Arctic breeding grounds (Baker *et al.* 2004). Much conservation  
423 attention has thus been focused on the site (Clark 1993, Atkinson *et al.* 2007, Niles *et al.* 2009,  
424 McGowan *et al.* 2011). However, an increasing body of evidence suggests that knots rely on a  
425 suite of stopover sites across the flyway for a variety of purposes (Cohen *et al.* 2010a, Tuma &  
426 Powell 2021). Our survey of the [www.bandedbirds.org](http://www.bandedbirds.org) database to connect the knots we  
427 resighted on KSI with other sites across the Atlantic Flyway corroborates these recent studies  
428 and revealed a network of more than 70 sites spanning Texas to Maryland (Fig. 5). Our  
429 geolocator results also indicate that Delaware Bay is likely not the only terminal stopover site  
430 used by knots prior to reaching the Canadian Arctic: the five spring migration departures we  
431 obtained from our three geolocator-carrying individuals indicate that they all skipped Delaware  
432 Bay after stopping in South Carolina (Fig. 4). These geolocator results are supported by the  
433 results of a recent study that used an automated radio telemetry array to track knots from South  
434 Carolina on their northward migration (Smith *et al. in prep.*) and which found that the majority  
435 of these knots skipped Delaware Bay and went directly to the Arctic from South Carolina.  
436 Nonetheless, resighting data from [www.bandedbirds.org](http://www.bandedbirds.org) also suggested that a substantial number  
437 of the knots stopping over in South Carolina are subsequently resighted in Delaware Bay in at  
438 least some years. Further tracking work, combined with on-the-ground efforts to quantify knot  
439 refueling rates and social dynamics, would therefore help clarify the migratory stopover  
440 decisions that result in different stopover behaviors being exhibited from year to year (e.g., Chan  
441 *et al.* 2019, Linscott & Senner 2021).

442

443 Regardless of whether knots are regularly using KSI and the greater South Carolina coast as a  
444 terminal stopover site, the comparable importance of KSI as a migratory stopover site for knots  
445 is clear. Though KSI is relatively small, we estimate that 41% of the total knot population is  
446 passing through during migration. What is more, a nocturnal roost supporting nearly half of the  
447 Atlantic Flyway population of Hudsonian Whimbrel (*Numenius hudsonicus*) was recently  
448 discovered on Deveaux Bank (Sanders *et al.* 2021), a site we also observed knots using during  
449 our study. Within the framework of the Western Hemisphere Shorebird Reserve Network, KSI  
450 (and Deveaux Bank) would therefore qualify as a site of Hemispheric Importance (WHSRN  
451 2021). The fact that KSI only comprises 24 km of beaches — with Deveaux Bank comprising  
452 just a few more — underscores its importance and, likely, sensitivity to conservation threats such  
453 as those associated with human disturbances, habitat degradation, and outright habitat loss.

454 Results from the loss and degradation of stopover sites used by knots elsewhere in the Atlantic  
455 Flyway (Baker *et al.* 2004) and across the globe (Studds *et al.* 2017) point to the consequences  
456 for the knot migratory network that such changes could cause (Xu *et al.* 2019). The importance  
457 of KSI is amplified even further if knots are indeed not only migrating through KSI but also  
458 overwintering there. In such a scenario, knots would be reliant on the site for most of their  
459 nonbreeding season (~6 months) and not just the spring migration period (~2-3 months).

460

### 461 ***Conservation implications***

462 Because of the variability of knot migratory patterns and their on-going population declines  
463 (Piersma *et al.* 2021, Tucker *et al.* 2021), it is critical to recognize the threats that knots are  
464 facing across the Atlantic Flyway. Delaware Bay, for instance, has suffered a > 75% decline in  
465 its use by knots since 1990, which Niles *et al.* (2009) suggested is likely related to declines in  
466 horseshoe crab numbers. To refuel sufficiently, knots need healthy populations of their prey,  
467 such as horseshoe crab eggs. At terminal stopover sites like Delaware Bay from which knots  
468 leave for their breeding grounds, they must be able to refuel and meet a certain weight threshold  
469 (e.g., > 180 g) to successfully complete their migrations (McGowan *et al.* 2011). Female crab  
470 abundance at Delaware Bay has thus been shown to positively correlate with an individual's  
471 ability to reach this body mass threshold and survive to subsequent years (Baker *et al.* 2004).  
472 Recent results from the Cape Romain National Wildlife Refuge in South Carolina indicate a  
473 similar positive correlation between horseshoe crab spawning and knot densities at the refuge  
474 (Takahashi *et al.* 2021). In our study area, knots appear to primarily feed on coquina clams on  
475 KSI itself, as horseshoe crabs do not currently occur on the islands, but horseshoe crabs do  
476 spawn on Deveaux Bank and knots are known to feed on their eggs there (Thibault & Levinsen  
477 2013). Maintaining and understanding the diversity of knot prey used in South Carolina —  
478 including both horseshoe crabs and coquina clams — is therefore important in order to enable  
479 knots to rapidly refuel and successfully complete their northward migrations.

480

481 Anthropogenic disturbance also poses a threat to knots that must focus their time and energy on  
482 foraging and building up sufficient pre-departure fat reserves to continue their northward  
483 migrations (Thomas *et al.* 2003). Burger *et al.* (2007) found that knots and other shorebirds using  
484 sites with little human disturbance were able to spend 70% of their time foraging, while their  
485 foraging efficiency was reduced by more than 40% at high disturbance sites. Because KSI is  
486 highly developed, with tourist attractions such as golf courses, public beach access points, and  
487 resorts, there is substantial human and dog traffic along its beaches. During our 13-week survey  
488 period we observed that, with the onset of spring, increasing numbers of people and dogs led to  
489 the frequent disturbance of knots and other shorebirds. Currently both islands do have dog leash  
490 laws intended to decrease the disturbance of wildlife: some areas are off limits to dogs year-  
491 round, while in others, dogs are allowed either on and/or off leash, depending on the time of day  
492 and year. For large portions of the two islands, however, these latter restrictions do not cover the  
493 entirety of the period that knots are likely present. On Kiawah Island, dogs are allowed off leash  
494 across much of the island from 1 November - 15 March, while on Seabrook Island, dogs can be  
495 off leash in the central portion of the island during the evening and early morning (17:00-09:59  
496 hrs), even from 1 April - 30 September (Towns of Kiawah Island and Seabrook Island). Our  
497 results suggest that these rules should be extended and enforced throughout the period knots are  
498 present on the islands.

499

500 Climate change poses an additional variety of unpredictable challenges to knots and their  
501 associated coastal habitats. The Mid-Atlantic Coast of the U.S. has exhibited some of the fastest  
502 rates of sea level rise in the world ( $\sim 4\text{-}10\text{ mm y}^{-1}$ ; Ezer & Corlett 2012). Because much of the  
503 Mid-Atlantic Coast (including KSI) is highly developed, increased inundation may cause the loss  
504 of critical habitat by squeezing beaches and mudflats in between existing infrastructure (von  
505 Holle *et al.* 2019). Sea level rise may also alter the geomorphology and hydrodynamic regimes  
506 of estuaries (Khojasteh *et al.* 2021), potentially altering key roosting sites such as Captain Sam's  
507 Inlet and Deveaux Bank. Subsequently, a reduction in habitat as a result of sea level rise (and  
508 other anthropogenic factors) could further increase human disturbance, as well as inter- and  
509 intraspecific competition for roosting and foraging areas (Goss-Custard 1988), thereby  
510 constraining the ability of knots to refuel (Baker *et al.* 2004). Efforts to preserve the integrity of  
511 the full suite of habitats currently found on KSI in the face of these potential changes, such as  
512 through beach replenishment and habitat migration strategies, is a major priority.

513

### 514 **Conclusions**

515 We provide evidence of the critical importance of the Kiawah-Seabrook Island complex as a  
516 stopover and overwintering site for knots. In order to preserve the site's ability to sustain  
517 shorebird populations, increased recognition and protection of the site is a priority. To this end,  
518 we recommend the nomination of KSI and neighboring Deveaux Bank as a Site of Hemispheric  
519 Importance in the Western Hemisphere Shorebird Reserve Network, as our results show that  
520 more than 40% of the *rufa* knot population, as well as 50% of the Atlantic Flyway Hudsonian  
521 Whimbrel population (Sanders *et al.* 2021), use the area. Because KSI may be serving as a  
522 terminal stopover site for knots, conservation measures should also focus on maintaining  
523 adequate abundances of knot prey to enable them to sufficiently refuel for nonstop flights to the  
524 Arctic. Human and dog disturbance on the islands lead to decreased foraging efficiency and use  
525 of roosting sites (Koch & Paton 2013); our study's estimates of knot stopover duration on KSI  
526 can be used to help inform the timing of leash laws and other restrictions. Finally, sea level rise  
527 is expected to be a source of difficulty for knots in terms of the loss of suitable foraging and  
528 roosting habitat, and should remain a factor in management decisions given the critical  
529 importance of Captain Sam's Inlet and the adjacent KSI beaches.

530

### 531 **ACKNOWLEDGEMENTS**

532 We are very grateful for the help of the Senner Lab at the University of South Carolina,  
533 biologists at the South Carolina Department of Natural Resources, and the volunteers from the  
534 Kiawah Island Shorebird Stewardship Program and the Seabrook Island Birders. We also thank  
535 L. Usyk from [www.bandedbirds.org](http://www.bandedbirds.org) for providing data and assistance, as well as Y. Aubry, H.  
536 Bellman, J. Brush, N. Martínez Curci, K. Kalasz, S. Koch, D. Newstead, L. Niles, and R.  
537 Rodrigues for permission to use their data. Helpful comments on early drafts were provided by J.  
538 Fraser, J. Lyons, S. Karpanty, T. Piersma, M. Stager, and M. Verhoeven. This research was  
539 supported by the South Carolina Department of Natural Resources and federal funding from  
540 South Carolina State Wildlife Grants to FS and JT, as well as a grant from the Magellan Scholars  
541 Program at the University of South Carolina to MP and SP, and a Carolina Bird Club Research  
542 Grant to SP. Finally, thanks to L. Niles for advice on geolocator deployment and retrieval, and  
543 M. Chaplin with the U.S. Fish and Wildlife Service for support

544

545 **LITERATURE CITED**

546 **Alerstam, T., A. Hedenström & S. Akesson.** 2003. Long-distance migration: evolution and  
547 determinants. *Oikos* 103: 247-260.

548

549 **Andres, B.A., P.A. Smith, R.I.G. Morrison, C.L. Gratto-Trevor, S.C. Brown & C.A. Friis.**  
550 2012. Population estimates of North American shorebirds. *Wader Study Group Bulletin* 119:  
551 178–194.

552 **Atkinson, P.W., A.J. Baker, K.A. Bennett, N.A. Clark, J.A. Clark, K.B. Cole, A. Dekinga,**  
553 **A. Dey, S. Gillings, P.M. González, K. Kalasz, C.D.T. Minton, J. Newton, L.J. Niles, T.**  
554 **Piersma, R.A. Robinson & H.P. Sitters.** 2007. Rates of mass gain and energy deposition in Red  
555 Knot on their final spring staging site is both time- and condition-dependent. *Journal of Applied*  
556 *Ecology* 44: 885–895.

557

558 **Banded Birds.** 2022. Shorebird Resighting Database: Banding Data Extraction:  
559 <http://www.bandedbirds.org>. Retrieved March 6, 2022.

560

561 **Baker, A.J., P.M. Gonzalez, T. Piersma, L.J. Niles, I. de Lima Serrano do Nascimento,**  
562 **P.W. Atkinson, N.A. Clark, C.D.T. Minton, M.K. Peck & G. Aarts.** 2004. Rapid population  
563 decline in Red Knots: fitness consequences of refuelling rates and late arrival in Delaware Bay.  
564 *Proceedings of the Royal Society of London B* 271: 875–882.

565

566 **Berkson, J. & C.N. Shuster, Jr.** 1999. The Horseshoe Crab: the battle for a true multiple-use  
567 resource. *Fisheries* 24: 6-10.

568

569 **Brooks, S.P. & A. Gelman.** 1998. General methods for monitoring convergence of iterative  
570 simulations. *Journal of Computational and Graphical Statistics* 7: 434-455.

571

572 **Brown, J. L.** 2014. SDMtoolbox: a python-based GIS toolkit for landscape genetic,  
573 biogeographic and species distribution model analyses. *Methods in Ecology and Evolution* 5:  
574 694–700.

575

576 **Buler, J.J., & F.R. Moore.** 2011. Migrant–habitat relationships during stopover along an  
577 ecological barrier: extrinsic constraints and conservation implications. *Journal of Ornithology*  
578 152: 101–112.

579

580 **Burger, J., S.A. Carlucci, C.W. Jeitner & L.J. Niles.** 2007. Habitat choice, disturbance, and  
581 management of foraging shorebirds and gulls at a migratory stopover. *Journal of Coastal*  
582 *Research* 23: 1159–1166.

583

584 **Burger, J., L.J. Niles, R.R. Porter, A.D. Dey, S. Koch & C. Gordon.** 2012. Migration and  
585 over-wintering of Red Knots (*Calidris canutus rufa*) along the Atlantic Coast of the United  
586 States. *Condor* 114: 302–313.

587



- 588 **Burnham, K.P. & D. R. Anderson.** 2002. Model selection and multimodel inference: a  
589 practical information-theoretic approach. Springer, New York, New York, USA.  
590
- 591 **Chan, Y.-C., T.L. Tibbitts, T. Lok, C.J. Hassell, H.-B. Peng, Z. Ma, Z.W. Zhang & T.**  
592 **Piersma.** 2019. Filling knowledge gaps in a threatened shorebird flyway through satellite  
593 tracking. *Journal of Applied Ecology* 56: 2305–2315.  
594
- 595 **Clark, K.E., L.J. Niles & J. Burger.** 1993. Abundance and distribution of migrant shorebirds in  
596 Delaware Bay. *Condor* 95: 694–705.  
597
- 598 **Clark, N.A., S. Gillings, A.J. Baker, P.M. González & R. Porter.** 2005. The production and  
599 use of permanently inscribed leg flags for waders. *Wader Study Group Bulletin* 108: 38-41.  
600
- 601 **Cohen, J., S.M. Karpanty J.D. Fraser, B.D. Watts & B.R. Truitt.** 2009. Residence  
602 probability and population size of Red Knots during spring stopover in the Mid-Atlantic region  
603 of the United States. *Journal of Wildlife Management* 73: 939-945.  
604
- 605 **Cohen, J.B., S.M. Karpanty & J.D. Fraser.** 2010. Habitat selection and behavior of Red Knots  
606 on the New Jersey Atlantic Coast during spring stopover. *Condor* 112: 655–662.  
607
- 608 **Cohen, J.B., S.M. Karpanty, J.D. Fraser & B.R. Truitt.** 2010. The effect of benthic prey  
609 abundance and size on Red Knot (*Calidris canutus*) distribution at an alternative migratory  
610 stopover site on the US Atlantic Coast. *Journal of Ornithology* 151: 355-364.  
611
- 612 **Conklin, J.R., N.R. Senner, P.F. Battley & T. Piersma.** 2017. Extreme migration and the  
613 individual quality spectrum. *Journal of Avian Biology* 48: 19-36.  
614
- 615 **Crosbie, S.F. & B.F.J. Manly.** 1985. Parsimonious modelling of capture-mark-recapture  
616 studies. *Biometrics* 41:385–398.  
617
- 618 **Doyle, B.C. & M.R. Adams.** 2015. Statistical evaluation of shoreline change: A case study from  
619 Seabrook Island, South Carolina. *Environmental & Engineering Geoscience* 21: 165-180.  
620
- 621 **Dybas, C.L.** 2021. High-stakes mudbank chase: At low tide, US Southeast dolphins “beach”  
622 their prey. *Oceanography* 34: <https://doi.org/10.5670/oceanog.2021.404>.  
623
- 624 **Ezer, T. & B. Corlett.** 2012. Is sea level rise accelerating in the Chesapeake Bay? A  
625 demonstration of a novel approach for analyzing sea level data. *Geophysical Research Letters*.  
626 39: L19605.  
627
- 628 **Gimenez, O., E. Cam & J.M. Gaillard.** 2018. Individual heterogeneity and capture-recapture  
629 models: What, why and how? *Oikos* 127: 664–686.  
630
- 631 **Gillings S., P.W. Atkinson, A.J. Baker, K.A. Bennett, N.A. Clark, K.B. Cole, P.M.**  
632 **González, K.S. Kalasz, C.D.T. Minton, L.J. Niles, R.C. Porter, I.D.L. Serrano, H.P. Sitters**

- 633 & **J.L. Woods**. 2009. Staging behavior in Red Knot (*Calidris canutus*) in Delaware Bay:  
634 implications for monitoring mass and population size. *Auk* 126: 54–63.  
635
- 636 **Goss-Custard, J.D., J.T. Cayford & S.E.G. Lea**. 1998. The changing trade-off between food  
637 finding and food stealing in juvenile oystercatchers. *Animal Behavior* 55: 745–760.  
638
- 639 **Iwamura T., H.P. Possingham, I. Chadès, C. Minton, N.J. Murray, D.L. Rogers, E.A.**  
640 **Treml & R.A. Fuller**. 2013. Migratory connectivity magnifies the consequences of habitat loss  
641 from sea-level rise for shorebird populations *Proceedings of the Royal Society B* 280: 20130325.  
642
- 643 **Kellner, K.** 2016. jagsUI: a wrapper around “rjags” to streamline “JAGS” analyses v. 1.4.4. R  
644 Foundation for Statistical Computing, Vienna, Austria. Accessed 20 February 2022.  
645
- 646 **Kéry, M. & M. Schaub**. 2012. Bayesian population analysis using WinBUGS: a hierarchical  
647 perspective, 1st ed. Academic Press, Waltham, Massachusetts.  
648
- 649 **Khojasteh, D., W. Glamore, V. Heimhuber & S. Felder**. 2021. Sea level rise impacts on  
650 estuarine dynamics: a review. *Science of The Total Environment* 780: 146470.  
651
- 652 **Koch, S.L. & P.W. Paton**. 2014. Assessing anthropogenic disturbances to develop buffer zones  
653 for shorebirds using a stopover site. *Journal of Wildlife Management* 78: 58-67.  
654
- 655 **Lisovski, S., S. Bauer, M. Briedis, S.C. Davidson, K.L. Dhanhal-Adams, M.T. Hallworth, J.**  
656 **Karagicheva, C.M. Meier, B. Merkel, J. Ouweland, L. Pederson, E. Rakhimberdiev, A.**  
657 **Roberto-Charron, N.E. Seavy, M.D. Sumner, C.M. Taylor, S.J. Wotherspoon & E.S.**  
658 **Bridge**. 2020. Light-level geolocator analyses: a user's guide. *Journal of Animal Ecology* 89:  
659 221– 236.  
660
- 661 **Linscott, J.A. & N.R. Senner**. 2021. Beyond refueling: investigating the diversity of functions  
662 of migratory stopover events. *Ornithological Applications* 123: 1–14.
- 663 **Lok, T., C.J. Hassell, T. Piersma, R. Pradel & O. Gimenez**. 2019. Accounting for  
664 heterogeneity when estimating stopover duration, timing and population size of Red Knots along  
665 the Luannan Coast of Bohai Bay, China. *Ecology and Evolution* 9: 6176–6188.  
666
- 667 **Lyons J., W. Kendall, J. Royle, S. Converse, B. Andres & J. Buchanan**. 2016. Population  
668 size and stopover duration estimation using mark-resight data and Bayesian analysis of a  
669 superpopulation model. *Biometrics* 72: 262-271.  
670
- 671 **Lyons, J.E., B. Winn, T. Keyes & K.S. Kalasz**. 2018. Post-breeding migration and connectivity  
672 of Red Knots in the western Atlantic. *Journal of Wildlife Management* 82: 383–396.  
673
- 674 **Lyons, J.E.** 2021. Red Knot stopover population size and migration ecology at Delaware Bay,  
675 USA, 2021. A report submitted to the Adaptive Resource Management Subcommittee and  
676 Delaware Bay Ecosystem Technical Committee of the Atlantic States Marine Fisheries  
677 Commission.  
678

- 679 **McGowan, C.P., J.E. Hines, J.D. Nichols, J.E. Lyons, D.R. Smith, K.S. Kalasz, L.J. Niles,**  
680 **A.D. Dey, N.A. Clark, P.W. Atkinson, C.D.T. Minton & W. Kendall.** (2011). Demographic  
681 consequences of migratory stopover: linking Red Knot survival to horseshoe crab spawning  
682 abundance. *Ecosphere* 2: 69.  
683
- 684 **Niles, L.J., H.P. Sitters, A.D. Dey, P.W. Atkinson, A.J. Baker, K.A. Bennett, R. Carmona,**  
685 **K.E. Clark, N.A. Clark, C. Espoz, P.M. González, B.A. Harrington, D.E. Hernández, K.S.**  
686 **Kalasz, R.G. Lathrop, R.N. Matus, C.D.T. Minton, R.I.G. Morrison, M.K. Peck, W. Pitts,**  
687 **R.A. Robinson & I.L. Serrano.** 2008. Status of the Red Knot (*Calidris canutus rufa*) in the  
688 Western Hemisphere. *Studies in Avian Biology* 36: 1-36.  
689
- 690 **Niles, L.J., J. Bart, H.P. Sitters, A.D. Dey, K.E. Clark, P.W. Atkinson, A.J. Baker, K.A.**  
691 **Bennett, K.S. Kalasz, N.A. Clark, K.J. Clark, S. Gillings, A.S. Gates, P.M. González, D.E.**  
692 **Hernández, C.D.T. Minton, R.I.G. Morrison, R.R. Porter, R.K. Ross & C.R. Veitch.** 2009.  
693 Effects of horseshoe crab harvest in Delaware Bay on Red Knots: are harvest restrictions  
694 working? *BioScience* 59: 153–164.  
695
- 696 **Niles, L., J. Burger, R.R. Porter, A. Dey, C.D.T. Minton, P.M. Gonzalez, A.J. Baker, J.W.**  
697 **Fox & C. Gordon.** 2010. First results using light level geolocators to track Red Knots in the  
698 Western Hemisphere show rapid and long intercontinental flights and new details of migration  
699 paths. *Wader Study Group Bulletin* 117: 1-8.  
700
- 701 **Niles, L.J., J. Burger, R.R. Porter, A.D. Dey, S. Koch, B. Harrington, K. Iaquinto & M.**  
702 **Boorman.** 2012. Migration pathways, migration speeds and non-breeding areas used by northern  
703 hemisphere wintering Red Knots *Calidris canutus* of the subspecies *rufa*. *Wader Study Group*  
704 *Bulletin* 119: 195-203.  
705
- 706 **Pan American Shorebird Group.** 2016. Pan American Shorebird Program Shorebird Marking  
707 Protocol. [https://www.shorebirdplan.org/wp-content/uploads/2016/08/PASP-Marking-Protocol-](https://www.shorebirdplan.org/wp-content/uploads/2016/08/PASP-Marking-Protocol-April-2016.pdf)  
708 [April-2016.pdf](https://www.shorebirdplan.org/wp-content/uploads/2016/08/PASP-Marking-Protocol-April-2016.pdf).  
709
- 710 **Piersma, T. & A.J. Baker.** 2000. Life history characteristics and the conservation of migratory  
711 shorebirds. In L.M. Gosling & W.J. Sutherland (Eds.), *Behaviour and conservation* (pp. 105-  
712 124). Cambridge: Cambridge University Press.  
713
- 714 **Piersma, T., D.I. Rogers, P.M. Gonzalez, L. Zwarts, L.J. Niles, I. de Lima S. do**  
715 **Nascimento, C.D.T. Minton & A.J. Baker.** 2005. Fuel storage rates before northward flights in  
716 Red Knots worldwide: facing the severest ecological constraint in tropical intertidal  
717 environments? In: Greenberg, R. and Marra, P. P. (eds.), *Birds of two worlds: ecology and*  
718 *evolution of migration*. Baltimore: Johns Hopkins University Press, pp. 262-273.  
719
- 720 **Piersma, T., E.M.A. Kok, C.J. Hassell, H.-B. Peng, Y.I. Verkuil, G. Lei, J. Karagicheva, E.**  
721 **Rakhimberdiev, P.W. Howey, T.L. Tibbitts & Y.-C. Chan.** 2021. When a typical jumper  
722 skips: itineraries and staging habitats used by Red Knots (*Calidris canutus piersmai*) migrating  
723 between northwest Australia and the New Siberian Islands. *Ibis* 163: 4, 1235-1251.  
724

- 725 **Plummer, M.** 2003. JAGS: Just Another Gibbs Sampler. [https://sourceforge.net/projects/mcmc-](https://sourceforge.net/projects/mcmc-jags/)  
726 [jags/](https://sourceforge.net/projects/mcmc-jags/). Accessed 20 February 2022.
- 727  
728 **Rakhimberdiev, E., N.R. Senner, M.A. Verhoeven, D.W. Winkler, W. Bouten & T.**  
729 **Piersma.** 2016. Comparing inferences of solar geolocation data against high-precision GPS data:  
730 annual movements of a double-tagged Black-tailed Godwit. *Journal of Avian Biology* 47: 589-  
731 596.
- 732  
733 **Rakhimberdiev, E., A. Saveliev, T. Piersma & J. Karagicheva.** 2017. FLightR: an r package  
734 for reconstructing animal paths from solar geolocation loggers. *Methods in Ecology and*  
735 *Evolution* 8: 1482-1487.
- 736  
737 **Rakhimberdiev, E., S. Duijns, J. Karagicheva, C.J. Camphuysen, V.R.S. Castricum, A.**  
738 **Dekinga, R. Dekker, A. Gavrilov, J. ten Horn, J. Jukema, A. Saveliev, M. Soloviev, T.L.**  
739 **Tibbitts, J.A. van Gils & T. Piersma.** 2018. Food abundance at refuelling sites can mitigate  
740 Arctic warming effects on a migratory bird. *Nature Communications* 9, 4263.
- 741  
742 **Rehfish, M.M., G.E. Austin, S.N. Freeman, M.J.S. Armitage & N.H.K. Burton.** 2004. The  
743 possible impact of climate change on the future distributions and numbers of waders on Britain's  
744 non-estuarine coast. *Ibis* 146: 70–80.
- 745  
746 **Royle, J.A. & R.M. Dorazio.** 2008. Hierarchical modeling and inference in ecology: the  
747 analysis of data from populations, metapopulations and communities. Academic Press, London,  
748 UK.
- 749  
750 **Royle, J.A. & R.M. Dorazio.** 2012. Parameter-expanded data augmentation for Bayesian  
751 analysis of capture-recapture models. *Journal of Ornithology* 152: S521–S537.
- 752  
753 **Sanders, F.J., M.C. Handmaker, A.S. Johnson & N.R. Senner.** 2021. Nocturnal roost on  
754 South Carolina coast supports nearly half of the Atlantic coast population of Hudsonian  
755 Whimbrel *Numenius hudsonicus* during northward migration. *Wader Study* 128: 117–124.
- 756  
757 **Shimazaki, H., M. Tamura, Y. Darman, V. Andronov, M.P. Parilov, M. Nagendran & H.**  
758 **Higuchi.** 2004. Network analysis of potential migration routes for Oriental White Storks  
759 (*Ciconia boyciana*). *Ecological Research* 19: 683-698.
- 760  
761 **Smith, F.M., B.D. Watts, J. Lyons, T. Keyes, B. Winn, A. Smith, F. Sanders & J. Thibault.**  
762 2019. Investigating Red Knot Migration Ecology along the Georgia and South Carolina Coasts:  
763 Spring 2019 Season Summaries. Center for Conservation Biology Technical Report Series:  
764 CCBTR-20-02. College of William and Mary/Virginia Commonwealth University,  
765 Williamsburg, VA. 53 pp.
- 766  
767 **South Carolina Department of Natural Resources.** 2015. South Carolina's State Wildlife  
768 Action Plan. Columbia, South Carolina. <https://www.dnr.sc.gov/swap/index.html>  
769



- 770 **South Carolina Department of Natural Resources.** 2018. Shorebird research underscores  
771 importance of South Carolina beaches. South Carolina Department of Natural Resources.  
772 [https://www.dnr.sc.gov/news/2018/jun/jun7\\_shorebirds.html](https://www.dnr.sc.gov/news/2018/jun/jun7_shorebirds.html).  
773
- 774 **Studds, C.E., B.E. Kendall, N.J. Murray, H.B. Wilson, D.I. Rogers, R.S. Clemens, K.**  
775 **Gosbell, C.J. Hassell, R. Jessop, D.S. Melville, D.A. Milton, C.D.T. Minton, H.P.**  
776 **Possingham, A.C. Riegen, P. Straw, E.J. Woehler & R.A. Fuller.** 2017. Rapid population  
777 decline in migratory shorebirds relying on Yellow Sea tidal mudflats as stopover sites. *Nature*  
778 *Communications* 8: 14895.  
779
- 780 **Sullivan, B.L., C.L. Wood, M.J. Iliff, R.E. Bonney, D. Fink & S. Kelling.** 2009. eBird: a  
781 citizen-based bird observation network in the biological sciences. *Biological Conservation* 142:  
782 2282-2292.  
783
- 784 **Takahashi, F., F.J. Sanders & P.G.R. Jodice.** 2021. Spatial and temporal overlap between  
785 foraging shorebirds and spawning horseshoe crabs (*Limulus polyphemus*) in the Cape Romain-  
786 Santee Delta Region of the U.S. Atlantic Coast. *Wilson Journal of Ornithology* 133: 58-72.  
787
- 788 **Thibault, J.** 2013. Assessing the status and use of Red Knots in South Carolina. USFWS  
789 Traditional Section 6 Grant Report. South Carolina Department of Natural Resources.  
790
- 791 **Thibault, J. & M. Levisen.** 2013. Red Knot prey availability project report. South Carolina  
792 Department of Natural Resources, Marine Resources Research Institute, Charleston, SC. 15pp.  
793
- 794 **Thomas, K., R.G. Kvitek & C. Bretz.** 2003. Effects of human activity on the foraging behavior  
795 of sanderlings *Calidris alba*. *Conservation Biology* 109: 67–71.  
796
- 797 **Tucker, A., C. McGowan, J. Lyons, A. DeRose-Wilson & L. Clark.** 2021. Species-specific  
798 demographic and behavioral responses to food availability during migratory stopover.  
799 *Population Ecology* 64: 19-34  
800
- 801 **Tuma, M.E. & A.N. Powell.** 2021. The Southeastern U.S. as a complex of use sites for  
802 nonbreeding rufa Red Knots: fifteen years of band-encounter data. *Wader Study* 128: 265-273.  
803
- 804 **U.S. Fish and Wildlife Service.** 2001. Endangered and Threatened Wildlife and Plants; Final  
805 Determination of Critical Habitat for Wintering Piping Plovers. 66 Fed. Reg. 36038-36143.  
806
- 807 **U.S. Fish and Wildlife Service.** 2014. Endangered and Threatened Wildlife and Plants;  
808 Threatened Species Status for the Rufa Red Knot. 79 Fed. Reg. 73706-73748.  
809
- 810 **van Gils, J.A., P.F. Battley, T. Piersma & R. Drent.** 2005. Reinterpretation of gizzard sizes of  
811 Red Knots world-wide emphasises overriding importance of prey quality at migratory stopover  
812 sites. *Proceedings of the Royal Society B* 272: 2609-2618.  
813

- 814 **von Holle, B., J.L Irish, A. Spivy, J.F. Weishampel, A. Meylan, M.H. Godfrey, M. Dodd,**  
815 **S.H. Schweitzer, T. Keyes, F. Sanders, M.K. Chaplin & N.R. Taylor.** 2019. Effects of future  
816 sea level rise on coastal habitat. *Journal of Wildlife Management* 83: 694-704.  
817
- 818 **White, G.C. & K.P. Burnham.** 1999. Program MARK: survival estimation from populations of  
819 marked animals. *Bird Study* 46: S120–139.  
820
- 821 **Wilcove, D.S. & M. Wikelski.** 2008. Going, Going, Gone: Is Animal Migration Disappearing.  
822 *PLoS Biology* 6: e188.  
823
- 824 **Xu, Y., Y. Si, J. Takekawa, Q. Liu, H.H.T. Prins, S. Yin, D.J. Prosser, P. Gong & W.F. de**  
825 **Boer.** 2019. A network approach to prioritize conservation efforts for migratory birds.  
826 *Conservation Biology* 34: 416-426.  
827
- 828 **Verkuil, Y.I., E. Tavares, P.M. González, K. Choffe, O. Haddrath, M. Peck, L.J. Niles, A.J.**  
829 **Baker, T. Piersma & J.R. Conklin.** 2021. Genetic structure in the nonbreeding range of *rufa*  
830 Red Knots suggests distinct Arctic breeding populations. *Ornithological Applications* 124:  
831 duab053.
